# Supplementary material
Source: PubMed Central journal article supplement (PMC8377613)
Supplement: NIHMS1730910-supplement-Fig_1.pdf [file NIHMS1730910-supplement-Fig_1.pdf]

Supplementary Figure 1

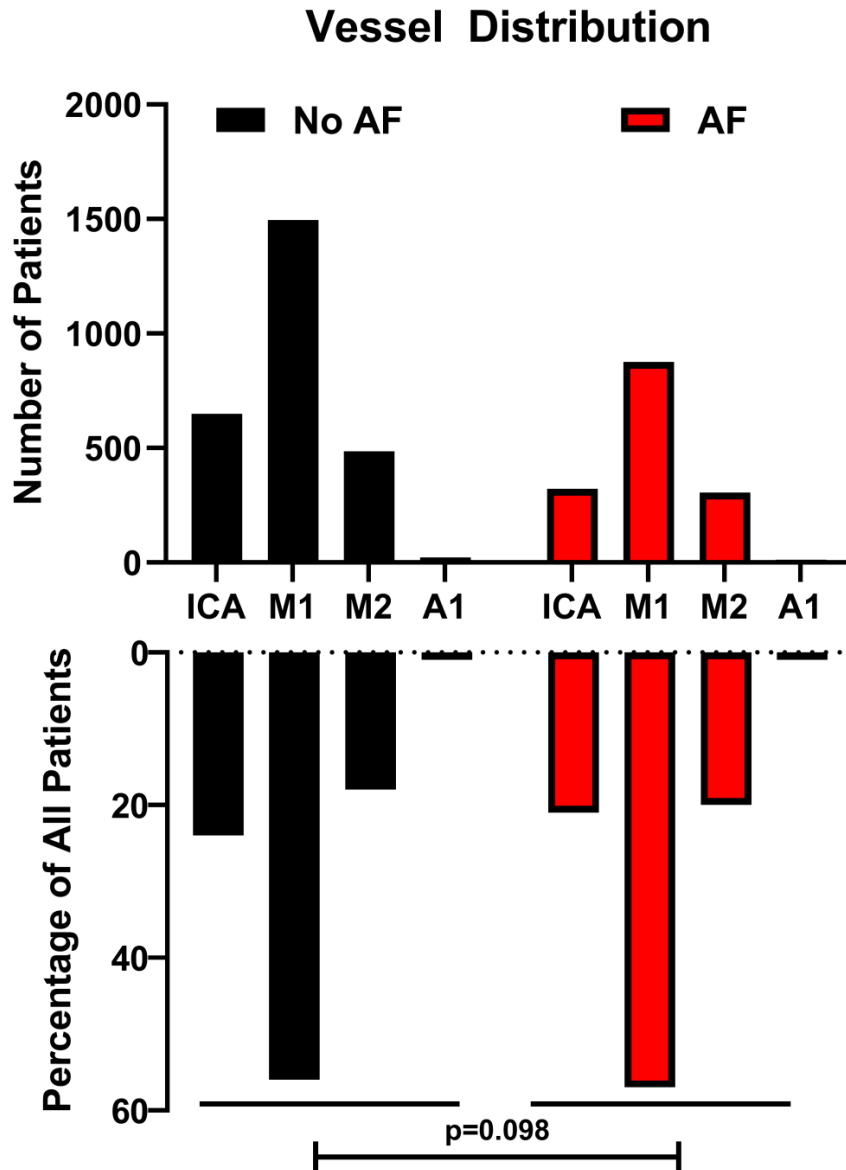

**Supplementary Figure 1. Distribution of thrombectomy patients by vessel and atrial fibrillation status.** There was no significant difference in distribution between the groups using a Chi-squared test.
